# Supplementary material
Source: PubMed Central journal article supplement (PMC9495657)
Supplement: NIHMS1835655-supplement-Supplementary_Material.pdf [file NIHMS1835655-supplement-Supplementary_Material.pdf]

# **Nosologic Spectrum of the Bicuspid Aortic Valve Condition: The Complex-presentation Valvulo-aortopathy**

## **SUPPLEMENTAL MATERIAL**

**Video 1.** *Parasternal long-axis zoomed view of the aortic valve and root.*

**Video 2.** *Parasternal short-axis zoomed view showing BAV with fused right-left cusps and preserved systolic opening.*
